# Supplementary material for: The water trimer reaction OH + (H2O)3 → (H2O)2OH + H2O
Source: Royal Society of Chemistry journal article supplement (doi:10.1039/d0cp01418d), 2020-01-01
Supplement: d0cp01418d1.pdf [file d0cp01418d1.pdf]

## The Water Trimer Reaction $\text{OH} + (\text{H}_2\text{O})_3 \rightarrow (\text{H}_2\text{O})_2\text{-OH} + \text{H}_2\text{O}$

Aifang Gao, Guoliang Li, Bin Peng, Jared Weidman, Yaoming Xie, and Henry F. Schaefer III

### Supporting Information

**Table S1.** The optimized geometries (Z-matrix) of the water trimer  $(\text{H}_2\text{O})_3$  with the CCSD(T) method (distances in Å and angles in degrees).

**Table S2.** The optimized geometries (Z-matrix) of the five complexes with the CCSD(T) method (distances in Å and angles in degrees).

**Table S3.** The optimized geometries (Z-matrix) of the seven transition states with the CCSD(T) method (distances in Å and angles in degrees).

**Table S4.** The optimized geometries (Z-matrix) of two conformers of the product  $(\text{H}_2\text{O})_2\text{OH}$  with the CCSD(T) method (distances in Å and angles in degrees).

**Table S1.** The optimized geometries (Z-matrix) of the water trimer (H<sub>2</sub>O)<sub>3</sub> with the CCSD(T) method (distances in Å and angles in degrees).

|                  | cc-pVDZ                   | cc-pVTZ                   | cc-pVQZ                   |
|------------------|---------------------------|---------------------------|---------------------------|
| O                | R1 = 0.967152598798065    | R1 = 0.959235188141124    | R1 = 0.957407797684201    |
| H 1 R1           | R2 = 0.979159791114356    | R2 = 0.972183904005455    | R2 = 0.970368330383760    |
| H 1 R2 2 A1      | A1 = 102.346847264227748  | A1 = 104.653593293955140  | A1 = 105.296831616503169  |
| H 1 R3 2 A2 3 T1 | R3 = 2.798015986298458    | R3 = 2.795472008601075    | R3 = 2.794992851164174    |
| H 4 R4 1 A3 2 T2 | A2 = 115.571093446185287  | A2 = 126.653201313263594  | A2 = 131.176922973294552  |
| H 4 R5 5 A4 1 T3 | T1 = -80.987193669314195  | T1 = -85.328405978221667  | T1 = -87.722765601342630  |
| O 1 R6 4 A5 2 T4 | R4 = 0.978860976833781    | R4 = 0.971718618331569    | R4 = 0.969827675116188    |
| H 7 R7 1 A6 2 T5 | A3 = 17.889626691463071   | A3 = 19.191517134163366   | A3 = 20.095212690665218   |
| H 7 R8 8 A7 1 T6 | T2 = -91.238996364539759  | T2 = -74.948887269931959  | T2 = -69.699772006855767  |
|                  | R5 = 0.967050441851343    | R5 = 0.959171833728753    | R5 = 0.957417709322551    |
|                  | A4 = 102.792388173081818  | A4 = 104.923830524040312  | A4 = 105.464424782643476  |
|                  | T3 = -110.287990677583494 | T3 = -130.645746154949194 | T3 = -136.407251785952894 |
|                  | R6 = 2.791657574199025    | R6 = 2.789037977963074    | R6 = 2.790220241192305    |
|                  | A5 = 59.861861733700934   | A5 = 59.823459376657844   | A5 = 59.863961957361489   |
|                  | T4 = -94.691214795942940  | T4 = -97.668743701665576  | T4 = -99.283982543796299  |
|                  | R7 = 0.978976740413913    | R7 = 0.972077380319586    | R7 = 0.970305530350375    |
|                  | A6 = 76.893769523076074   | A6 = 78.118776947189545   | A6 = 78.653145412845802   |
|                  | T5 = -107.772970055064462 | T5 = -118.907353285457916 | T5 = -123.912572088591546 |
|                  | R8 = 0.967378717441062    | R8 = 0.959540978823563    | R8 = 0.957744284692813    |
|                  | A7 = 102.380197926300426  | A7 = 104.577322769094607  | A7 = 105.144429898514602  |
|                  | T6 = 112.599233367926189  | T6 = 119.705030816794562  | T6 = 121.976703052034338  |

**Table S2.** The optimized geometries (Z-matrix) of the five complexes with the CCSD(T) method (distances in Å and angles in degrees).

| <b>CPI</b>         | cc-pVDZ                   | cc-pVTZ                   | cc-pVQZ                   |
|--------------------|---------------------------|---------------------------|---------------------------|
| O                  | R1 = 0.979124951304948    | R1 = 0.971902074075598    | R1 = 0.969831804533138    |
| H 1 R1             | R2 = 0.967727756785880    | R2 = 0.960051970033241    | R2 = 0.958192328587773    |
| H 1 R2 2 A1        | A1 = 102.861035946994519  | A1 = 104.885732845262751  | A1 = 105.412656888387218  |
| O 1 R3 3 A2 2 T1   | R3 = 2.729358992506742    | R3 = 2.723785762074466    | R3 = 2.729924954806438    |
| H 4 R4 1 A3 2 T2   | A2 = 114.441894671034746  | A2 = 118.575566536645013  | A2 = 121.132999617010157  |
| H 4 R5 5 A4 1 T3   | T1 = 85.707396212259880   | T1 = 89.569989528449028   | T1 = 91.717619548581411   |
| O 1 R6 4 A5 3 T4   | R4 = 0.985651407696979    | R4 = 0.978348463019297    | R4 = 0.976107746339321    |
| H 7 R7 1 A6 3 T5   | A3 = 13.644204010510833   | A3 = 14.008626811636944   | A3 = 14.177242070348123   |
| H 7 R8 8 A7 1 T6   | T2 = 179.161223224215604  | T2 = -176.825737179138173 | T2 = -178.483650650837490 |
| H 4 R9 7 A8 1 T7   | R5 = 0.967805807341881    | R5 = 0.959913201312414    | R5 = 0.958276420435852    |
| O 10 R10 6 A9 5 T8 | A4 = 103.368981789746897  | A4 = 105.540323022173766  | A4 = 105.871474762872225  |
|                    | T3 = -116.037497978375981 | T3 = -129.243184637474371 | T3 = -129.268912095045010 |
|                    | R6 = 2.775715588604965    | R6 = 2.769917119476642    | R6 = 2.769510433499927    |
|                    | A5 = 62.507183233989679   | A5 = 62.790806752924780   | A5 = 62.823802297980833   |
|                    | T4 = 98.377216217851341   | T4 = 102.279242218836913  | T4 = 103.860914300298305  |
|                    | R7 = 0.975117398746941    | R7 = 0.967749239800233    | R7 = 0.965863674765605    |
|                    | A6 = 79.711304011488991   | A6 = 81.489514687144464   | A6 = 82.574195886506743   |
|                    | T5 = 108.020462482176342  | T5 = 115.540812923777167  | T5 = 118.848730707677191  |
|                    | R8 = 0.967047319216683    | R8 = 0.959223531034588    | R8 = 0.957450647934658    |
|                    | A7 = 103.018518906502791  | A7 = 105.126639002947769  | A7 = 105.719088151849689  |
|                    | T6 = -118.369577661297384 | T6 = -129.892389672022915 | T6 = -135.552633973011126 |
|                    | R9 = 1.889244916772000    | R9 = 1.895536774547542    | R9 = 1.892258606130886    |
|                    | A8 = 125.206217677026586  | A8 = 112.594037119558763  | A8 = 110.812753811445759  |
|                    | T7 = -103.215123243257025 | T7 = -103.611636499487517 | T7 = -107.293270902519382 |
|                    | R10 = 0.984942619597847   | R10 = 0.978009883852047   | R10 = 0.977051076846343   |
|                    | A9 = 157.700392000928247  | A9 = 160.781991318487002  | A9 = 159.485822888587933  |
|                    | T8 = 134.632648061095324  | T8 = 137.150626586384021  | T8 = 143.500366622275067  |

| CP2a               | cc-pVDZ                   | cc-pVTZ                   | cc-pVQZ                   |
|--------------------|---------------------------|---------------------------|---------------------------|
| O                  | R1 = 0.984930080283060    | R1 = 0.978414231217641    | R1 = 0.976469733671164    |
| H 1 R1             | R2 = 0.967028113789323    | R2 = 0.959172290995967    | R2 = 0.957390523865166    |
| H 1 R2 2 A1        | A1 = 102.893761554293647  | A1 = 105.165671040703714  | A1 = 105.788228832812806  |
| O 1 R3 3 A2 2 T1   | R3 = 3.849089523132092    | R3 = 3.834597877400073    | R3 = 3.830079624706634    |
| H 4 R4 1 A3 2 T2   | A2 = 124.492503559213517  | A2 = 131.678248602563315  | A2 = 135.301226804785045  |
| H 4 R5 5 A4 1 T3   | T1 = 52.920842897558487   | T1 = 54.076975382409046   | T1 = 54.516484522639196   |
| O 1 R6 4 A5 3 T4   | R4 = 0.979053591123210    | R4 = 0.973003683961590    | R4 = 0.971294122570931    |
| H 7 R7 1 A6 3 T5   | A3 = 53.276555634588306   | A3 = 53.829786688889889   | A3 = 54.496853990789745   |
| H 7 R8 8 A7 1 T6   | T2 = -178.383596542871572 | T2 = 177.403227389996999  | T2 = 175.540600046378387  |
| O 7 R9 1 A8 3 T7   | R5 = 0.967036417135755    | R5 = 0.959277701877323    | R5 = 0.957531001172511    |
| H 10 R10 7 A9 9 T8 | A4 = 102.788253129718171  | A4 = 104.877400463880917  | A4 = 105.452986008355055  |
|                    | T3 = 124.010302045596276  | T3 = 132.290971817250579  | T3 = 136.372833840281288  |
|                    | R6 = 2.737162016466796    | R6 = 2.728629642269366    | R6 = 2.732533406822448    |
|                    | A5 = 45.626885552994274   | A5 = 45.709452274944582   | A5 = 45.859464323124548   |
|                    | T4 = 76.080898196839073   | T4 = 75.536149643207452   | T4 = 74.619153093177658   |
|                    | R7 = 0.982891856494464    | R7 = 0.976418017150701    | R7 = 0.974510393044819    |
|                    | A6 = 96.228098985248536   | A6 = 96.883756122886069   | A6 = 97.153022059954296   |
|                    | T5 = 120.968529637760668  | T5 = 127.775285979402881  | T5 = 131.752689890535919  |
|                    | R8 = 0.967353208760859    | R8 = 0.959611457583299    | R8 = 0.957846607984624    |
|                    | A7 = 102.423262352992197  | A7 = 104.535174684007742  | A7 = 105.079764960547379  |
|                    | T6 = -116.823551452976176 | T6 = -121.310671630037291 | T6 = -123.072582548300105 |
|                    | R9 = 3.953840245715078    | R9 = 3.942089831049103    | R9 = 3.955958182212046    |
|                    | A8 = 43.296145307851319   | A8 = 43.372871386201389   | A8 = 43.244502232772554   |
|                    | T7 = 119.132866727808704  | T7 = 124.690501752154219  | T7 = 127.911351087068482  |
|                    | R10 = 1.000293247341222   | R10 = 0.992243734511707   | R10 = 0.989959401324965   |
|                    | A9 = 50.540063065902807   | A9 = 50.411741470867739   | A9 = 50.637794279249356   |
|                    | T8 = -95.120103823052574  | T8 = -95.175768195515431  | T8 = -94.839434964636794  |

| CP2b              | cc-pVDZ                   | cc-pVTZ                   | cc-pVQZ        |
|-------------------|---------------------------|---------------------------|----------------|
| O                 | R1 = 0.999970993982013    | R1 = 0.991710163754109    | R1 = 0.98929   |
| H 1 R1            | R2 = 1.883390031449714    | R2 = 1.875027075066050    | R2 = 1.88194   |
| H 1 R2 2 A1       | A1 = 98.532765507563212   | A1 = 98.305737081590479   | A1 = 98.8120   |
| O 1 R3 2 A2 3 T1  | R3 = 2.845336410984757    | R3 = 2.830522201464524    | R3 = 2.83379   |
| H 4 R4 1 A3 2 T2  | A2 = 94.097255813051220   | A2 = 93.754768834681343   | A2 = 94.0870   |
| O 1 R5 4 A4 5 T3  | T1 = -0.826658502084383   | T1 = 0.356979443816977    | T1 = 0.7900    |
| H 6 R6 1 A5 4 T4  | R4 = 0.967203056483265    | R4 = 0.959404254813498    | R4 = 0.95763   |
| H 6 R7 1 A6 4 T5  | A3 = 104.839893037777784  | A3 = 109.884469338800301  | A3 = 111.9040  |
| O 6 R8 1 A7 4 T6  | T2 = -113.303883879247238 | T2 = -119.229729694594980 | T2 = -123.6450 |
| H 9 R9 6 A8 1 T7  | R5 = 2.713742253700275    | R5 = 2.706244666074668    | R5 = 2.70939   |
| H 9 R10 6 A9 1 T8 | A4 = 87.471176935770671   | A4 = 86.884077182134220   | A4 = 86.7330   |
|                   | T3 = -113.230188170992946 | T3 = -118.106122306549437 | T3 = -122.3470 |
|                   | R6 = 0.966585377949417    | R6 = 0.958589362303592    | R6 = 0.95682   |
|                   | A5 = 119.027593038872510  | A5 = 125.877899116677398  | A5 = 129.3100  |
|                   | T4 = -116.986019641025408 | T4 = -129.346351288864582 | T4 = -133.7470 |
|                   | R7 = 0.984484449340256    | R7 = 0.977545490229156    | R7 = 0.97549   |
|                   | A6 = 101.251619731392296  | A6 = 102.530119939269667  | A6 = 103.4700  |
|                   | T5 = -4.543416812161798   | T5 = -9.123697938571745   | T5 = -8.9900   |
|                   | R8 = 2.743572124070696    | R8 = 2.735483161476703    | R8 = 2.73760   |
|                   | A7 = 93.206664896122419   | A7 = 93.677924696498550   | A7 = 93.9380   |
|                   | T6 = -4.908399077211763   | T6 = -6.504727978440633   | T6 = -5.6720   |
|                   | R9 = 0.967094248100667    | R9 = 0.959353822798317    | R9 = 0.95756   |
|                   | A8 = 117.138343600423212  | A8 = 122.918939754583718  | A8 = 125.4910  |
|                   | T7 = -98.612429107479187  | T7 = -101.794802420927752 | T7 = -105.2660 |
|                   | R10 = 0.983023682323958   | R10 = 0.976494284603477   | R10 = 0.97457  |
|                   | A9 = 95.687464376984892   | A9 = 95.399423631128897   | A9 = 95.7930   |
|                   | T8 = 8.406190236337501    | T8 = 9.301333192892514    | T8 = 7.8770    |

| CP2c              | cc-pVDZ                   | cc-pVTZ                   |
|-------------------|---------------------------|---------------------------|
| O                 | R1 = 1.000383715537280    | R1 = 0.992348472716062    |
| H 1 R1            | R2 = 1.726311530353464    | R2 = 1.730351934167598    |
| O 2 R2 1 A1       | A1 = 169.574242504567252  | A1 = 169.675225101268097  |
| H 3 R3 2 A2 1 T1  | R3 = 0.984740278366588    | R3 = 0.978277925183975    |
| O 3 R4 2 A3 1 T2  | A2 = 103.964957347665134  | A2 = 104.671387730525296  |
| H 5 R5 3 A4 2 T3  | T1 = -2.271445472638540   | T1 = -5.215991695536086   |
| O 5 R6 3 A5 2 T4  | R4 = 2.735603884092700    | R4 = 2.729349367893243    |
| H 7 R7 5 A6 3 T5  | A3 = 97.442582716500240   | A3 = 97.382621217871431   |
| H 3 R8 2 A7 1 T6  | T2 = -4.312015078443794   | T2 = -5.760239927588600   |
| H 5 R9 3 A8 2 T7  | R5 = 0.982587098544583    | R5 = 0.975718754418677    |
| H 7 R10 5 A9 3 T8 | A4 = 97.077199417040390   | A4 = 97.606893320761714   |
|                   | T3 = 0.252777184588760    | T3 = -1.104239000431168   |
|                   | R6 = 2.762314754291930    | R6 = 2.752868801713722    |
|                   | A5 = 88.695793034924051   | A5 = 88.333766844996461   |
|                   | T4 = 1.686963019862158    | T4 = -2.352225635501202   |
|                   | R7 = 0.979092875909836    | R7 = 0.972794490319046    |
|                   | A6 = 98.637275030122794   | A6 = 99.580007859663411   |
|                   | T5 = -3.819499837255085   | T5 = 3.779750428888155    |
|                   | R8 = 0.967156010418420    | R8 = 0.959278594784451    |
|                   | A7 = 114.748625289139028  | A7 = 118.740634003081780  |
|                   | T6 = -113.687658556027415 | T6 = -121.939507886238701 |
|                   | R9 = 0.966964933895760    | R9 = 0.959310539768373    |
|                   | A8 = 115.885187676153478  | A8 = 118.341346439198873  |
|                   | T7 = 108.452743477747845  | T7 = 110.474165025170535  |
|                   | R10 = 0.966867094832772   | R10 = 0.958830821858516   |
|                   | A9 = 119.354755623556727  | A9 = 129.613240547325347  |
|                   | T8 = 106.052304723712382  | T8 = 122.595610916439156  |

| CP2d              | cc-pVDZ                   | cc-pVTZ                   |
|-------------------|---------------------------|---------------------------|
| O                 | B1 = 0.983991039718487    | B1 = 0.977249596744550    |
| H 1 B1            | B2 = 0.966343150665979    | B2 = 0.958491547182441    |
| H 1 B2 2 A1       | A1 = 103.638636175190413  | A1 = 105.788211241738267  |
| O 1 B3 3 A2 2 D1  | B3 = 2.709460219801790    | B3 = 2.703819571774110    |
| H 4 B4 1 A3 3 D2  | A2 = 121.796994817618042  | A2 = 127.230482151635428  |
| O 1 B5 4 A4 5 D3  | D1 = 112.387267433927818  | D1 = 119.424837867537278  |
| H 6 B6 1 A5 4 D4  | B4 = 0.999659689180964    | B4 = 0.991532602593637    |
| H 6 B7 1 A6 4 D5  | A3 = 7.094773204423986    | A3 = 7.270482571132755    |
| O 6 B8 1 A7 4 D6  | D2 = 58.198543692026405   | D2 = 44.551532476612252   |
| H 9 B9 6 A8 1 D7  | B5 = 2.750193276834648    | B5 = 2.740258058081792    |
| H 9 B10 6 A9 1 D8 | A4 = 92.764861296398905   | A4 = 93.464701959577226   |
|                   | D3 = 171.257586623628157  | D3 = 167.671320100237921  |
|                   | B6 = 0.967102503055434    | B6 = 0.959287546070851    |
|                   | A5 = 114.024045882169915  | A5 = 120.626261026954410  |
|                   | D4 = -89.046936294970550  | D4 = -95.734557330610514  |
|                   | B7 = 0.982484456021712    | B7 = 0.975571033596009    |
|                   | A6 = 96.077534354934173   | A6 = 95.886699407644798   |
|                   | D5 = 17.521439957193980   | D5 = 15.064167553393093   |
|                   | B8 = 2.762014165183971    | B8 = 2.754873892014967    |
|                   | A7 = 87.597970111830918   | A7 = 86.546358754239691   |
|                   | D6 = 14.206008914317684   | D6 = 14.638019420013123   |
|                   | B9 = 0.966550885416392    | B9 = 0.958690759904041    |
|                   | A8 = 122.688457573035251  | A8 = 131.518121976786489  |
|                   | D7 = -122.404659142165798 | D7 = -134.792121469641529 |
|                   | B10 = 0.978610349731134   | B10 = 0.972470574715901   |
|                   | A9 = 98.460593146153172   | A9 = 99.973725000642290   |
|                   | D8 = -11.030003063706383  | D8 = -14.062703049520541  |

**Table S3.** The optimized geometries (Z-matrix) of the seven transition states with the CCSD(T) method (distances in Å and angles in degrees).

| TS1              | cc-pVDZ                   | cc-pVTZ              | cc-pVTZ              |
|------------------|---------------------------|----------------------|----------------------|
| O                | B1 = 0.983673328806322    | B1 = 0.9761901063    | B1 = 0.9743909823    |
| H 1 B1           | B2 = 0.966217149169664    | B2 = 0.9589208810    | B2 = 0.9574457324    |
| H 1 B2 2 A1      | A1 = 103.934537986370430  | A1 = 105.4210843545  | A1 = 105.7898656906  |
| O 2 B3 1 A2 3 D1 | B3 = 1.793520266583632    | B3 = 1.7998242776    | B3 = 1.8061490563    |
| H 4 B4 2 A3 1 D2 | A2 = 158.100863822496564  | A2 = 159.0899879632  | A2 = 159.2831047363  |
| H 4 B5 2 A4 1 D3 | D1 = 117.943766697651995  | D1 = 120.5133869624  | D1 = 123.1311725227  |
| O 5 B6 4 A5 2 D4 | B4 = 0.979511308044798    | B4 = 0.9717807280    | B4 = 0.9695035349    |
| H 7 B7 5 A6 4 D5 | A3 = 87.858735749683518   | A3 = 89.9250566374   | A3 = 91.0571174954   |
| H 7 B8 5 A7 4 D6 | D2 = 3.602374407809257    | D2 = 7.5242864946    | D2 = 9.0569827354    |
| H 1 B9 2 A8 4 D7 | B5 = 0.967613325957235    | B5 = 0.9597773506    | B5 = 0.9580099609    |
| O 10 B10 1 A9 2  | A4 = 113.887096146905321  | A4 = 119.0647136338  | A4 = 120.4495259857  |
| D8               | D3 = 106.531653824611141  | D3 = 114.3775164042  | D3 = 117.4404536396  |
|                  | B6 = 1.859794490111393    | B6 = 1.8608596781    | B6 = 1.8754777368    |
|                  | A5 = 153.560140711320059  | A5 = 151.2892357437  | A5 = 149.5340051999  |
|                  | D4 = 9.394676646319075    | D4 = 9.5923723456    | D4 = 6.7433844658    |
|                  | B7 = 0.973933106321345    | B7 = 0.9657455218    | B7 = 0.9638845536    |
|                  | A6 = 90.842475736115375   | A6 = 96.0597727438   | A6 = 97.7590576039   |
|                  | D5 = -7.939947811324408   | D5 = -14.3589512739  | D5 = -13.3868839402  |
|                  | B8 = 0.966985605555022    | B8 = 0.9587439803    | B8 = 0.9570885102    |
|                  | A7 = 118.433882261854151  | A7 = 135.9941935253  | A7 = 142.1038377383  |
|                  | D6 = -113.059505182260096 | D6 = -133.6542653545 | D6 = -141.6580718513 |
|                  | B9 = 1.874277522256421    | B9 = 1.8811770956    | B9 = 1.8819118476    |
|                  | A8 = 122.427124176682298  | A8 = 128.1374743488  | A8 = 128.2119197417  |
|                  | D7 = -88.988615445576954  | D7 = -79.1011633639  | D7 = -78.8822414957  |
|                  | B10 = 0.984191554574542   | B10 = 0.9778626501   | B10 = 0.9768884924   |
|                  | A9 = 166.693914745207962  | A9 = 165.4019006871  | A9 = 166.4884268792  |
|                  | D8 = 85.600417063243668   | D8 = 100.6651298308  | D8 = 103.8782066422  |

| <b>TS2a</b>       | cc-pVDZ                   | cc-pVTZ                   |
|-------------------|---------------------------|---------------------------|
| O                 | R1 = 0.995016777714190    | R1 = 0.989037708910158    |
| H 1 R1            | R2 = 1.104164997542990    | R2 = 1.098820245078721    |
| H 1 R2 2 A1       | A1 = 102.251632388455420  | A1 = 103.962267687690627  |
| O 3 R3 1 A2 2 T1  | R3 = 1.248341444123708    | R3 = 1.245187056124402    |
| H 4 R4 3 A3 1 T2  | A2 = 136.249538917263692  | A2 = 138.425616131715543  |
| O 2 R5 1 A4 3 T3  | T1 = -73.433559985407172  | T1 = -71.360573641934224  |
| H 6 R6 2 A5 1 T4  | R4 = 0.974749218830211    | R4 = 0.967065489383878    |
| H 6 R7 2 A6 1 T5  | A3 = 99.181559962226842   | A3 = 101.279643990543050  |
| O 8 R8 6 A7 2 T6  | T2 = -53.102602564242723  | T2 = -53.135190152488221  |
| H 9 R9 8 A8 6 T7  | R5 = 1.731526280506570    | R5 = 1.732924152504327    |
| H 9 R10 8 A9 6 T8 | A4 = 175.703971190530126  | A4 = 175.473541728028607  |
|                   | T3 = 10.448249259269636   | T3 = 6.680773057957360    |
|                   | R6 = 0.967568903367457    | R6 = 0.959718024054811    |
|                   | A5 = 111.606718489645374  | A5 = 115.734744425523004  |
|                   | T4 = 123.962202206191648  | T4 = 129.149799060927251  |
|                   | R7 = 0.983154580107675    | R7 = 0.976395609815869    |
|                   | A6 = 100.661668146033065  | A6 = 100.754090503932360  |
|                   | T5 = 15.751500107459412   | T5 = 16.757477409703508   |
|                   | R8 = 1.781794334883902    | R8 = 1.786745165382484    |
|                   | A7 = 162.965871303074152  | A7 = 162.236531348862400  |
|                   | T6 = 12.331434454454481   | T6 = 5.742313545612884    |
|                   | R9 = 0.967450013775728    | R9 = 0.959644771182486    |
|                   | A8 = 113.201485927357211  | A8 = 118.700358018938758  |
|                   | T7 = -119.316323891067583 | T7 = -118.069679479617122 |
|                   | R10 = 0.980157431730499   | R10 = 0.973636614222099   |
|                   | A9 = 93.115152219887833   | A9 = 95.385228585577195   |
|                   | T8 = -14.248501838295342  | T8 = -7.959379332189320   |

| <b>TS2b</b>        | cc-pVDZ                   | cc-pVTZ                   |
|--------------------|---------------------------|---------------------------|
| O                  | R1 = 0.994856100906863    | R1 = 0.989077043538856    |
| H 1 R1             | R2 = 1.115730487999070    | R2 = 1.102625224192560    |
| H 1 R2 2 A1        | A1 = 101.653392479536222  | A1 = 103.822691962078537  |
| O 1 R3 2 A2 3 T1   | R3 = 3.885017646892514    | R3 = 3.785941966652331    |
| H 4 R4 1 A3 2 T2   | A2 = 48.204471139742452   | A2 = 48.959557205339273   |
| H 4 R5 5 A4 1 T3   | T1 = -21.535195605339364  | T1 = -22.425641508598250  |
| O 1 R6 4 A5 6 T4   | R4 = 0.979760904370452    | R4 = 0.973231704835759    |
| H 7 R7 1 A6 4 T5   | A3 = 41.777693937225550   | A3 = 44.039731383543227   |
| H 7 R8 8 A7 1 T6   | T2 = 181.720717468801325  | T2 = -178.600609155260486 |
| O 7 R9 1 A8 6 T7   | R5 = 0.967426603408265    | R5 = 0.959368857163931    |
| H 10 R10 7 A9 9 T8 | A4 = 103.075684028876069  | A4 = 105.121459828408831  |
|                    | T3 = -116.543738294985829 | T3 = -124.833705407421647 |
|                    | R6 = 2.726528826512448    | R6 = 2.720064120110679    |
|                    | A5 = 45.060486656548754   | A5 = 46.156906067979619   |
|                    | T4 = -101.816025711455424 | T4 = -104.347598817783847 |
|                    | R7 = 0.982525189182209    | R7 = 0.976238187889390    |
|                    | A6 = 100.727531929943339  | A6 = 99.175623585991687   |
|                    | T5 = 3.302962787893843    | T5 = 1.753411477596475    |
|                    | R8 = 0.967501044983773    | R8 = 0.959764605291855    |
|                    | A7 = 102.456174935364686  | A7 = 104.784324660636898  |
|                    | T6 = 113.084288806466745  | T6 = 119.631112536904638  |
|                    | R9 = 3.524234864759490    | R9 = 3.593211183301981    |
|                    | A8 = 38.203614082167135   | A8 = 37.498626176629429   |
|                    | T7 = -16.221898240760041  | T7 = -14.986224095727001  |
|                    | R10 = 0.974559120820654   | R10 = 0.967072613606873   |
|                    | A9 = 111.639665717806196  | A9 = 111.623388890416805  |
|                    | T8 = 159.799032234461151  | T8 = 161.113180684891830  |

| <b>TS2c</b>       | cc-pVDZ                  | cc-pVTZ                   |
|-------------------|--------------------------|---------------------------|
| O                 | R1 = 0.994658281034145   | R1 = 0.988645641156167    |
| H 1 R1            | R2 = 1.104221696984123   | R2 = 1.100424830334134    |
| H 1 R2 2 A1       | A1 = 102.302462455632238 | A1 = 103.942998867980194  |
| O 3 R3 1 A2 2 T1  | R3 = 1.246338681240623   | R3 = 1.241794870977106    |
| H 4 R4 3 A3 1 T2  | A2 = 137.008720676249709 | A2 = 138.881898800850593  |
| O 2 R5 1 A4 3 T3  | T1 = -72.534032705430434 | T1 = -70.489151273820596  |
| H 6 R6 2 A5 1 T4  | R4 = 0.974921401822908   | R4 = 0.967251163302770    |
| H 6 R7 2 A6 1 T5  | A3 = 99.050626014688063  | A3 = 101.223181709583841  |
| O 8 R8 6 A7 2 T6  | T2 = -50.874256304741721 | T2 = -51.634577524598441  |
| H 9 R9 8 A8 6 T7  | R5 = 1.732861613615646   | R5 = 1.735268418276758    |
| H 9 R10 8 A9 6 T8 | A4 = 174.335868058636152 | A4 = 175.957798131392508  |
|                   | T3 = -15.408959272599180 | T3 = 2.272548458239709    |
|                   | R6 = 0.967271654522780   | R6 = 0.959474055918331    |
|                   | A5 = 111.108971450914567 | A5 = 115.723239564308884  |
|                   | T4 = -62.591786532260294 | T4 = -93.210503015748898  |
|                   | R7 = 0.982701973219522   | R7 = 0.975624853950394    |
|                   | A6 = 101.928324170750059 | A6 = 101.675447417934279  |
|                   | T5 = 46.554251267061730  | T5 = 20.068527430657774   |
|                   | R8 = 1.794494909615020   | R8 = 1.802651142945835    |
|                   | A7 = 161.411001006910567 | A7 = 160.645339439305019  |
|                   | T6 = -11.106138368831481 | T6 = 6.560480528027716    |
|                   | R9 = 0.967079445108525   | R9 = 0.959282027354102    |
|                   | A8 = 117.757245210703218 | A8 = 123.701393699237087  |
|                   | T7 = -99.849837100536732 | T7 = -120.896936319570059 |
|                   | R10 = 0.979859197771288  | R10 = 0.973407708484601   |
|                   | A9 = 93.432557429293539  | A9 = 95.663994428479057   |
|                   | T8 = 6.420914294534779   | T8 = -8.775071247007341   |

| <b>TS3a (Cs)</b> | cc-pVDZ                   | cc-pVTZ                   |
|------------------|---------------------------|---------------------------|
| O                | R1 = 3.427559693095440    | R1 = 3.431717503653837    |
| O 1 R1           | R2 = 0.968188168538088    | R2 = 0.960969441353294    |
| H 2 R2 1 A1      | A1 = 119.182712684349426  | A1 = 125.112243477300765  |
| H 2 R3 1 A2 3 T1 | R3 = 1.168397294359298    | R3 = 1.164437377342735    |
| O 2 R4 1 A3 3 T2 | A2 = 50.054100676248659   | A2 = 50.368907410666992   |
| H 5 R5 2 A4 1 T3 | T1 = -86.613527035183225  | T1 = -85.826886830977173  |
| O 2 R4 1 A3 3 T4 | R4 = 2.404121332060328    | R4 = 2.394686238278469    |
| H 7 R5 2 A4 1 T5 | A3 = 45.209756366748422   | A3 = 44.886649673973011   |
| H 2 R3 1 A2 3 T6 | T2 = -85.214650820216619  | T2 = -84.382708035929156  |
| H 7 R6 2 A5 1 T7 | R5 = 1.138547359208855    | R5 = 1.136001850848374    |
| H 5 R6 2 A5 1 T8 | A4 = 95.724137699679474   | A4 = 96.255853171018913   |
|                  | T3 = 0.358793664858616    | T3 = -0.164195747252768   |
|                  | T4 = 85.214650820216619   | T4 = 84.382708035929156   |
|                  | T5 = -0.358793664858616   | T5 = 0.164195747252768    |
|                  | T6 = 86.613527035183225   | T6 = 85.826886830977173   |
|                  | R6 = 0.967666859565242    | R6 = 0.959898862136848    |
|                  | A5 = 111.763829666141149  | A5 = 115.501584109640305  |
|                  | T7 = 109.605179580461936  | T7 = 114.697478696347943  |
|                  | T8 = -109.605179580461936 | T8 = -114.697478696347943 |



| <b>TS3b</b>      | cc-pVDZ                    | cc-pVTZ                    |
|------------------|----------------------------|----------------------------|
| O                | R1 = 2.432561121440929     | R1 = 2.421833860237584     |
| O 1 R1           | R2 = 2.404643014566217     | R2 = 2.393445850757753     |
| O 2 R2 1 A2      | A2 = 90.697023248226387    | A2 = 91.454573326396073    |
| O 3 R3 2 A3 1 T3 | R3 = 2.404459003741164     | R3 = 2.395276409531863     |
| H 2 R4 3 A4 4 T4 | A3 = 89.979761817355708    | A3 = 89.240966592849929    |
| H 3 R5 4 A5 1 T5 | T3 = -1.935986390743361    | T3 = -2.191385464497677    |
| H 3 R6 2 A6 1 T6 | R4 = 1.141253079061886     | R4 = 1.137142953568381     |
| H 4 R7 3 A7 2 T7 | A4 = 95.936355901757580    | A4 = 96.650746915463046    |
| H 2 R8 1 A8 4 T8 | T4 = -2.042259856484876    | T4 = -3.417520893264141    |
| H 3 R9 2 A9 1 T9 | R5 = 1.168739744184791     | R5 = 1.163790891563551     |
| H 4 R10 3 A10 2  | A5 = 95.325764775272205    | A5 = 95.189765941480886    |
| T10              | T5 = 0.718474785070231     | T5 = -0.436186504999630    |
|                  | R6 = 1.171101201424591     | R6 = 1.165460665321734     |
|                  | A6 = 94.649934626212982    | A6 = 94.494472247919774    |
|                  | T6 = -2.761428633297020    | T6 = -3.133882950536064    |
|                  | R7 = 1.136628291168470     | R7 = 1.133516791150804     |
|                  | A7 = 95.971806890287368    | A7 = 96.561260117794774    |
|                  | T7 = 1.816897816944269     | T7 = 1.056864077921369     |
|                  | R8 = 0.967527873177083     | R8 = 0.959465924218787     |
|                  | A8 = 108.323655816158990   | A8 = 113.183628528859046   |
|                  | T8 = 117.077232311135774   | T8 = 124.544912806956063   |
|                  | R9 = 0.967847136977838     | R9 = 0.960601262949774     |
|                  | A9 = 110.394672458898697   | A9 = 114.773144590625080   |
|                  | T9 = 106.018705128016862   | T9 = 109.810437408942178   |
|                  | R10 = 0.967893298899293    | R10 = 0.960070981050012    |
|                  | A10 = 110.501637984102970  | A10 = 114.700533314044947  |
|                  | T10 = -107.591600684543025 | T10 = -113.272932541762529 |

| <b>TS3c (Cs)</b> | cc-pVDZ                   | cc-pVTZ                   |
|------------------|---------------------------|---------------------------|
| O                | R1 = 3.422201002592645    | R1 = 3.438257215619261    |
| O 1 R1           | R2 = 0.967838036983058    | R2 = 0.960552409473676    |
| H 2 R2 1 A1      | A1 = 107.411402892059712  | A1 = 114.643195689643591  |
| H 2 R3 1 A2 3 T1 | R3 = 1.170261292790297    | R3 = 1.164261176982789    |
| O 2 R4 1 A3 3 T2 | A2 = 50.566080282573616   | A2 = 50.469555798369996   |
| H 5 R5 2 A4 1 T3 | T1 = -97.317540918861368  | T1 = -95.382477976468479  |
| O 2 R4 1 A3 3 T4 | R4 = 2.404939987548732    | R4 = 2.394356561945327    |
| H 7 R5 2 A4 1 T5 | A3 = 45.262621376609005   | A3 = 44.734134436855520   |
| H 2 R3 1 A2 3 T6 | T2 = -99.246170789859946  | T2 = -99.239006436936450  |
| H 7 R6 2 A5 1 T7 | R5 = 1.137467992065135    | R5 = 1.133758618867728    |
| H 5 R6 2 A5 1 T8 | A4 = 95.698073356126429   | A4 = 96.740906385665753   |
|                  | T3 = -0.028609880965809   | T3 = 0.520436303389754    |
|                  | T4 = 99.246170789859946   | T4 = 99.239006436936450   |
|                  | T5 = 0.028609880965809    | T5 = -0.520436303389754   |
|                  | T6 = 97.317540918861368   | T6 = 95.382477976468479   |
|                  | R6 = 0.967344368678850    | R6 = 0.959373239821044    |
|                  | A5 = 114.452361937686305  | A5 = 119.202047568551777  |
|                  | T7 = -111.088253669218005 | T7 = -117.451768391542970 |
|                  | T8 = 111.088253669218005  | T8 = 117.451768391542970  |

**Table S4.** The optimized geometries (Z-matrix) of two conformers of the product (H<sub>2</sub>O)<sub>2</sub>OH with the CCSD(T) method (distances in Å and angles in degrees).

| (H <sub>2</sub> O) <sub>2</sub> OH-a | cc-pVDZ                   | cc-pVTZ                   | cc-pVQZ                   |
|--------------------------------------|---------------------------|---------------------------|---------------------------|
| O                                    | R1 = 2.024360157460766    | R1 = 2.035505079696688    | R1 = 2.046381178373274    |
| H 1 R1                               | R2 = 0.974919053458221    | R2 = 0.968251919919354    | R2 = 0.966552648256915    |
| O 2 R2 1 A1                          | A1 = 148.830892972360346  | A1 = 147.530464679984192  | A1 = 146.406100427744406  |
| H 3 R3 2 A2 1 T1                     | R3 = 1.878097389951483    | R3 = 1.891090691915692    | R3 = 1.900336848146418    |
| O 1 R4 3 A3 2 T2                     | A2 = 88.528832708125890   | A2 = 90.362037663552400   | A2 = 91.483551929447728   |
| H 1 R5 5 A4 3 T3                     | T1 = -3.466201739782615   | T1 = 5.204129696537604    | T1 = 7.949111848855162    |
| H 3 R6 2 A5 1 T4                     | R4 = 2.765400372599386    | R4 = 2.770686905872201    | R4 = 2.773633410144801    |
| H 5 R7 1 A6 3 T5                     | A3 = 58.760981018777173   | A3 = 58.607665843614733   | A3 = 58.550951075613852   |
|                                      | T2 = -175.090709910803554 | T2 = 174.743898774909781  | T2 = 171.472402996653869  |
|                                      | R5 = 0.994205037225581    | R5 = 0.985484425910817    | R5 = 0.983383678459623    |
|                                      | A4 = 14.819274565736491   | A4 = 15.259752386725982   | A4 = 15.718668491041845   |
|                                      | T3 = -178.783526883529788 | T3 = -173.034132566403969 | T3 = -171.894317606696575 |
|                                      | R6 = 0.967278517327261    | R6 = 0.959411658092615    | R6 = 0.957642888831807    |
|                                      | A5 = 102.729198770792010  | A5 = 104.884699452887432  | A5 = 105.465194180533587  |
|                                      | T4 = 112.578335651810832  | T4 = 131.219499017922800  | T4 = 138.194404272493529  |
|                                      | R7 = 0.967259945456131    | R7 = 0.959324147084962    | R7 = 0.957531663011315    |
|                                      | A6 = 116.880954620886627  | A6 = 125.737033992558381  | A6 = 129.215262669343275  |
|                                      | T5 = 97.869655111693319   | T5 = 102.754900495572784  | T5 = 105.093996620059301  |

| (H <sub>2</sub> O) <sub>2</sub> OH-b | cc-pVDZ                   | cc-pVTZ                   | cc-pVTZ                   |
|--------------------------------------|---------------------------|---------------------------|---------------------------|
| O                                    | B1 = 2.764129686726911    | B1 = 2.766899094295976    | B1 = 2.769957677517637    |
| O 1 B1                               | B2 = 2.791095023303573    | B2 = 2.780778498713625    | B2 = 2.775812966894010    |
| O 2 B2 1 A1                          | A1 = 63.018558387748961   | A1 = 62.981520395086513   | A1 = 62.937389643177134   |
| H 1 B3 2 A2 3 D1                     | B3 = 0.993860466905565    | B3 = 0.985209182843146    | B3 = 0.983128096787533    |
| H 3 B4 2 A3 1 D2                     | A2 = 14.686450532311277   | A2 = 15.175200710943166   | A2 = 15.555467216886500   |
| H 3 B6 2 A5 1 D4                     | D1 = -178.670904421945522 | D1 = -179.925865827435331 | D1 = -179.141036036348453 |
| H 2 B5 1 A4 3 D3                     | B4 = 0.974866373694762    | B4 = 0.968085583119179    | B4 = 0.966287476783400    |
| H 2 B7 1 A6 3 D5                     | A3 = 79.106783050648232   | A3 = 80.295471853466211   | A3 = 81.469613446890222   |
|                                      | D2 = 4.354663039234600    | D2 = 1.579999633907437    | D2 = 0.611204721885249    |
|                                      | B6 = 0.967024144324823    | B6 = 0.959058216035591    | B6 = 0.957188357288054    |
|                                      | A5 = 120.547577271772894  | A5 = 134.818712627378176  | A5 = 143.042298365715482  |
|                                      | D4 = -94.014788810725321  | D4 = -99.877825075047724  | D4 = -104.151067217165220 |
|                                      | B5 = 0.978052730395386    | B5 = 0.970547588389802    | B5 = 0.968426700835339    |
|                                      | A4 = 82.097197603548750   | A4 = 83.835348956144315   | A4 = 85.016041008958425   |
|                                      | D3 = 0.519153770109417    | D3 = -4.165450425653830   | D3 = -5.406671448650377   |
|                                      | B7 = 0.966919054507927    | B7 = 0.958975049351411    | B7 = 0.957237032791377    |
|                                      | A6 = 119.047199981147372  | A6 = 128.332465632729850  | A6 = 131.553276509059430  |
|                                      | D5 = -100.254292284359721 | D5 = -108.980868248011006 | D5 = -112.373261087828652 |
